# Supplementary material for: Conformations of polyolefins on platinum catalysts control product distribution in plastics recycling
Source: Royal Society of Chemistry journal article supplement (doi:10.1039/d2sc04772a), 2023-01-01
Supplement: d2sc04772a1.pdf [file d2sc04772a1.pdf]

## **Conformations of polyolefins on platinum catalysts control product distribution in plastics recycling**

Mehdi Zare,<sup>1</sup> Pavel A. Kots,<sup>1</sup> Stavros Caratzoulas,<sup>1\*</sup> and Dionisios G. Vlachos<sup>1,2\*</sup>

<sup>1</sup>*Center for Plastics Innovation, University of Delaware, 221 Academy Street, Newark, Delaware 19716, United States*

<sup>2</sup>*Department of Chemical and Biomolecular Engineering, University of Delaware, 150 Academy Street, Newark, Delaware 19716, United States*

\*Corresponding authors: [cstavros@udel.edu](mailto:cstavros@udel.edu), [vlachos@udel.edu](mailto:vlachos@udel.edu)

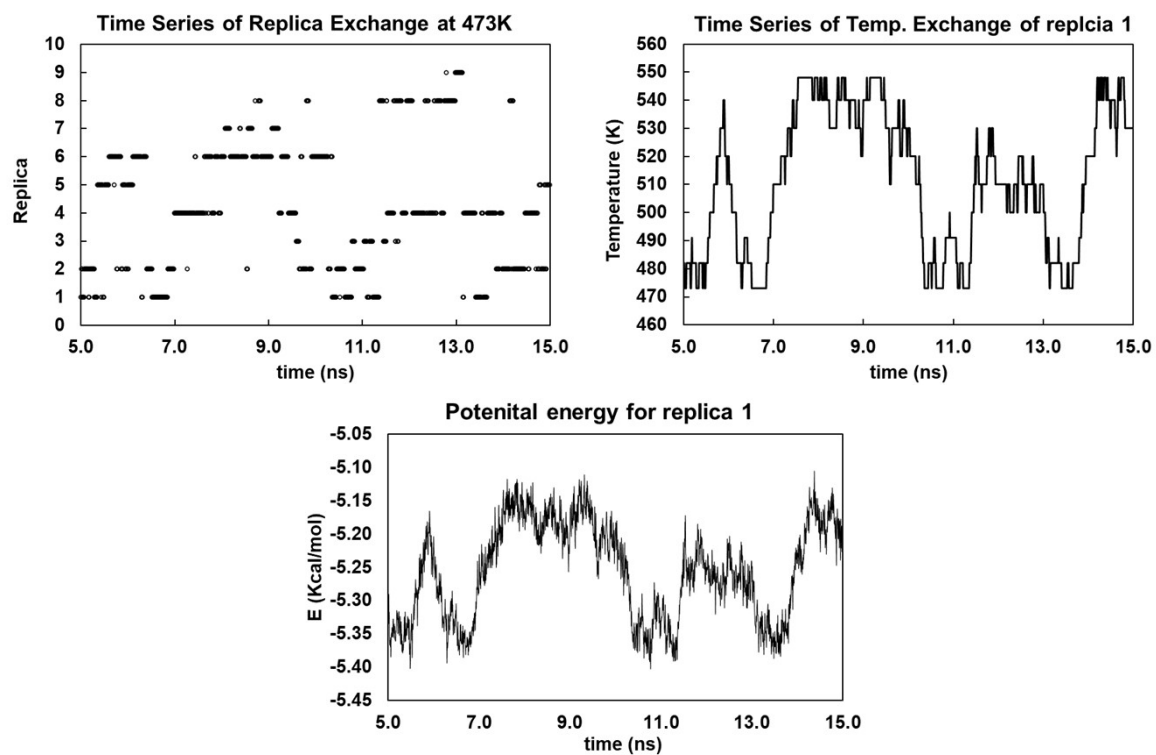

**Figure S1.** Times series obtained from replica exchange MD simulation of  $C_{26}$  PE melt over the Pt(111) catalyst surface. Plots prove a free random walk in both replica and temperature space. We note that the potential energies are normalized per number of atoms in the system.

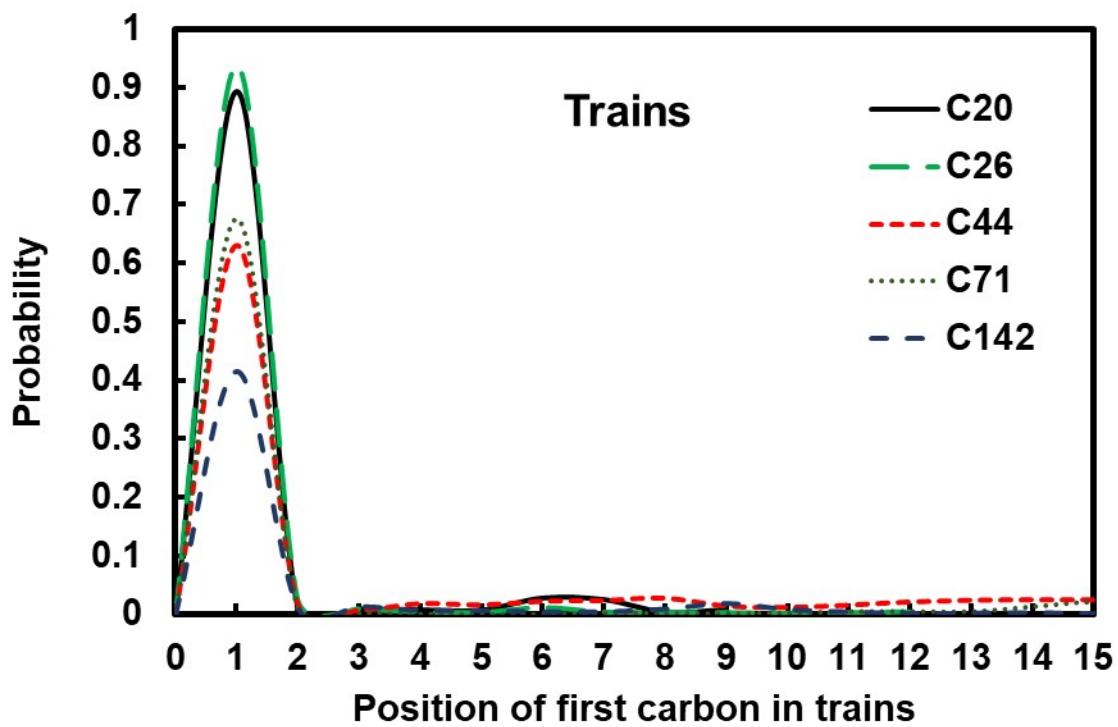

**Figure S2.** Probability of a chain atom being at the beginning of a train polymer chains of varying length. The distributions show that the preponderance of polymer chains preferably adsorb with their ends.

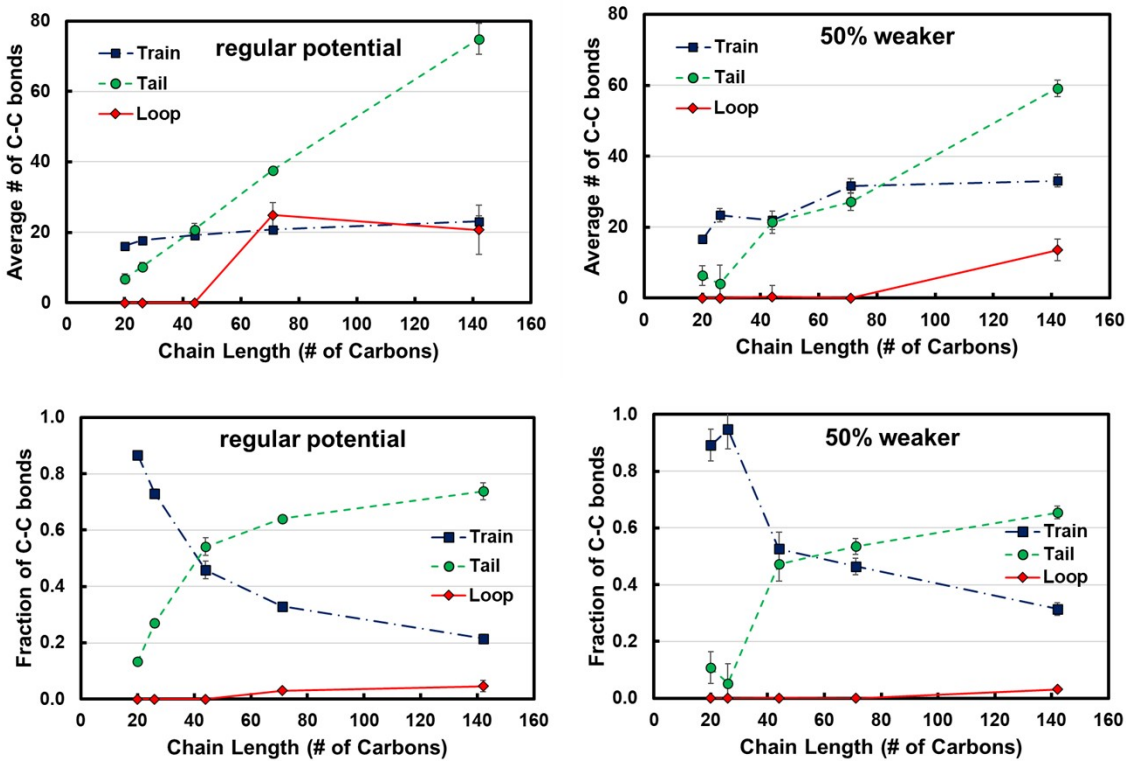

Figure S3. Effects of the Pt potential strength on  $\bar{l}_{train}$ ,  $\bar{l}_{tail}$ ,  $\bar{l}_{loop}$ ,  $f_{train}$ ,  $f_{tail}$ , and  $f_{loop}$ .

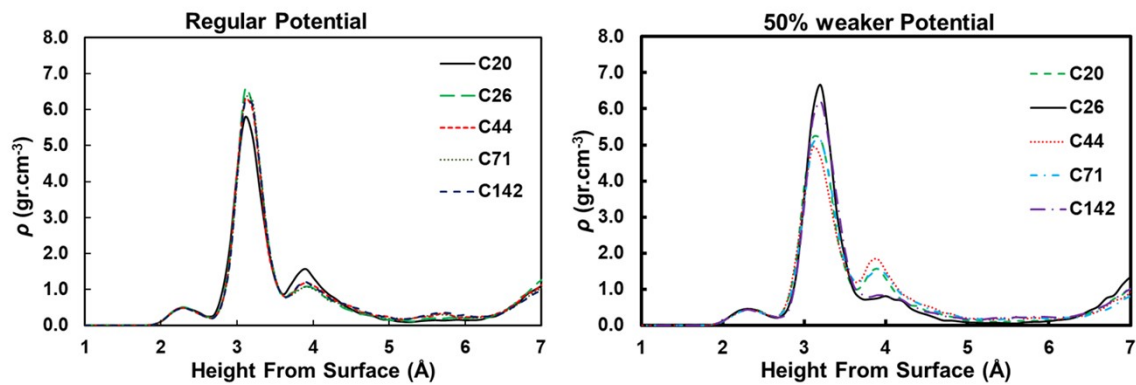

**Figure S4.** Effects of the Pt potential strength on density distributions as a function of height from the Pt(111) catalyst surface (along the surface normal) for the pure PE melts investigated in this work.

**Table S1.** Number of chains and simulation boxes used in this work to study the dynamics of PE melts over the Pt(111) catalyst surface at 473 K.

| System                                              | Simulation Box              | Number of Chains                         |
|-----------------------------------------------------|-----------------------------|------------------------------------------|
| <b>Pure PE melts</b>                                |                             |                                          |
| C <sub>20</sub>                                     | 33.24 Å × 33.59 Å × 60.00 Å | 83                                       |
| C <sub>26</sub>                                     | 33.24 Å × 33.59 Å × 60.00 Å | 64                                       |
| C <sub>44</sub>                                     | 41.55 Å × 40.79 Å × 75.00 Å | 38                                       |
| C <sub>71</sub>                                     | 41.55 Å × 40.79 Å × 75.00 Å | 43                                       |
| C <sub>142</sub>                                    | 41.55 Å × 40.79 Å × 75.00 Å | 22                                       |
| <b>Mixtures of PE melts</b>                         |                             |                                          |
| C <sub>142</sub> :C <sub>20</sub> (73%:27%)         | 41.55 Å × 40.79 Å × 75.00 Å | 16 C <sub>142</sub> : 43 C <sub>20</sub> |
| C <sub>142</sub> :C <sub>20</sub> mixture (50%:50%) | 41.55 Å × 40.79 Å × 75.00 Å | 11 C <sub>142</sub> : 78 C <sub>20</sub> |
| C <sub>142</sub> :C <sub>20</sub> mixture (27%:73%) | 41.55 Å × 40.79 Å × 75.00 Å | 6 C <sub>142</sub> : 114 C <sub>20</sub> |
| <b>Branched PE melts</b>                            |                             |                                          |
| C <sub>71</sub> with 7 methyl branches              | 41.55 Å × 40.79 Å × 75.00 Å | 39                                       |
| C <sub>71</sub> with 13 methyl branches             | 41.55 Å × 40.79 Å × 75.00 Å | 36                                       |
| C <sub>71</sub> with 7 ethyl branches               | 41.55 Å × 40.79 Å × 75.00 Å | 36                                       |
| C <sub>71</sub> with 7 propyl branches              | 41.55 Å × 40.79 Å × 75.00 Å | 33                                       |

**Table S2.** Radius of gyration ( $R_g$ ) for the investigated PE melts in the bulk at 473 K.

| PE melt          | Radius of Gyration (Å) |
|------------------|------------------------|
| C <sub>20</sub>  | 5.63                   |
| C <sub>26</sub>  | 6.87                   |
| C <sub>44</sub>  | 9.84                   |
| C <sub>71</sub>  | 13.56                  |
| C <sub>142</sub> | 20.51                  |

**Table S3.** Temperatures (replicas) selected for replica exchange MD simulations and the acceptance probability of swap moves ( $P_{acc}$ ) between adjacent replicas for a) pure PE melts, b) mixtures of PE melts, and c) branched PE melts systems over the Pt(111) surface.

a)

| <b>C<sub>20</sub> PE melt</b> |           | <b>C<sub>26</sub> PE melt</b> |           | <b>C<sub>44</sub> PE melt</b> |           | <b>C<sub>71</sub> PE melt</b> |           | <b>C<sub>142</sub> PE melt</b> |           |
|-------------------------------|-----------|-------------------------------|-----------|-------------------------------|-----------|-------------------------------|-----------|--------------------------------|-----------|
| T (K)                         | $P_{acc}$ | T (K)                          | $P_{acc}$ |
| 473                           | 0.21      | 473                           | 0.19      | 473                           | 0.23      | 473                           | 0.22      | 473                            | 0.18      |
| 482                           | 0.23      | 482                           | 0.23      | 482                           | 0.24      | 480                           | 0.22      | 480                            | 0.19      |
| 491                           | 0.24      | 491                           | 0.20      | 491                           | 0.23      | 487                           | 0.21      | 487                            | 0.21      |
| 500                           | 0.22      | 500                           | 0.18      | 500                           | 0.22      | 494                           | 0.17      | 494                            | 0.18      |
| 510                           | 0.21      | 510                           | 0.23      | 509                           | 0.22      | 501                           | 0.22      | 501                            | 0.18      |
| 520                           | 0.23      | 520                           | 0.23      | 518                           | 0.22      | 508                           | 0.21      | 508                            | 0.19      |
| 530                           | 0.19      | 530                           | 0.22      | 527                           | 0.23      | 515                           | 0.20      | 515                            | 0.19      |
| 540                           | 0.22      | 540                           | 0.21      | 536                           | 0.19      | 522                           | 0.20      | 522                            | 0.17      |
| 548                           | 0.22      | 548                           | 0.24      | 545                           | 0.25      | 529                           | 0.20      | 529                            | 0.19      |

b)

| <b>C<sub>142</sub>:C<sub>20</sub> (73%:27%)</b> |           | <b>C<sub>142</sub>:C<sub>20</sub> (50%:50%)</b> |           | <b>C<sub>142</sub>:C<sub>20</sub> (27%:73%)</b> |           |
|-------------------------------------------------|-----------|-------------------------------------------------|-----------|-------------------------------------------------|-----------|
| T (K)                                           | $P_{acc}$ | T (K)                                           | $P_{acc}$ | T (K)                                           | $P_{acc}$ |
| 473                                             | 0.17      | 473                                             | 0.18      | 473                                             | 0.18      |
| 480                                             | 0.19      | 480                                             | 0.22      | 480                                             | 0.21      |
| 487                                             | 0.22      | 487                                             | 0.17      | 487                                             | 0.21      |
| 494                                             | 0.17      | 494                                             | 0.21      | 494                                             | 0.20      |
| 501                                             | 0.21      | 501                                             | 0.21      | 501                                             | 0.20      |
| 508                                             | 0.16      | 508                                             | 0.18      | 508                                             | 0.18      |
| 515                                             | 0.18      | 515                                             | 0.22      | 515                                             | 0.20      |
| 522                                             | 0.20      | 522                                             | 0.17      | 522                                             | 0.18      |
| 529                                             | 0.20      | 529                                             | 0.19      | 529                                             | 0.14      |

c)

| <b>C<sub>71</sub> with 7 methyl branches</b> |           | <b>C<sub>71</sub> with 13 methyl branches</b> |           | <b>C<sub>71</sub> with 7 ethyl branches</b> |           | <b>C<sub>71</sub> with 7 propyl branches</b> |           |
|----------------------------------------------|-----------|-----------------------------------------------|-----------|---------------------------------------------|-----------|----------------------------------------------|-----------|
| T (K)                                        | $P_{acc}$ | T (K)                                         | $P_{acc}$ | T (K)                                       | $P_{acc}$ | T (K)                                        | $P_{acc}$ |
| 473                                          | 0.20      | 473                                           | 0.21      | 473                                         | 0.18      | 473                                          | 0.19      |
| 480                                          | 0.21      | 480                                           | 0.22      | 480                                         | 0.21      | 480                                          | 0.22      |
| 487                                          | 0.18      | 487                                           | 0.18      | 487                                         | 0.21      | 487                                          | 0.20      |
| 494                                          | 0.22      | 494                                           | 0.21      | 494                                         | 0.19      | 494                                          | 0.19      |
| 501                                          | 0.20      | 501                                           | 0.18      | 501                                         | 0.19      | 501                                          | 0.23      |
| 508                                          | 0.16      | 508                                           | 0.22      | 508                                         | 0.20      | 508                                          | 0.20      |
| 515                                          | 0.20      | 515                                           | 0.19      | 515                                         | 0.20      | 515                                          | 0.21      |
| 522                                          | 0.18      | 522                                           | 0.24      | 522                                         | 0.20      | 522                                          | 0.17      |
| 529                                          | 0.17      | 529                                           | 0.23      | 529                                         | 0.20      | 529                                          | 0.22      |

**Table S4.** Effects of the Pt potential strength on  $\lambda_{tr}$  and Carbon populations of the pure PE chains studied in this work up to 6 Å height from the Pt(111) surface.

| Chain       | Regular Potential |                                              | 50% Weaker Potential |                                              |
|-------------|-------------------|----------------------------------------------|----------------------|----------------------------------------------|
|             | $\lambda_{tr}$    | 0-6 Å Carbon population (#C/Å <sup>2</sup> ) | $\lambda_{tr}$       | 0-6 Å Carbon population (#C/Å <sup>2</sup> ) |
| <b>C20</b>  | 16±0.3            | 0.1726                                       | 17±1.2               | 0.1674                                       |
| <b>C26</b>  | 18±0.5            | 0.1741                                       | 23±1.9               | 0.1633                                       |
| <b>C44</b>  | 19±1.3            | 0.1781                                       | 22±2.6               | 0.1752                                       |
| <b>C71</b>  | 21±0.3            | 0.1772                                       | 32±2.0               | 0.1752                                       |
| <b>C142</b> | 23±1.5            | 0.1806                                       | 33±1.8               | 0.1735                                       |
